# Supplementary material for: Altered SOD1 maturation and post-translational modification in amyotrophic lateral sclerosis spinal cord
Source: PubMed Central journal article supplement — Brain. 2022 May 5;145(9):3108–30. doi: 10.1093/brain/awac165 (PMC9473357; doi:10.1093/brain/awac165), 2022-05-05
Supplement: awac165_supplementary_data.pdf [file awac165_supplementary_data.pdf]

**Full title: Altered SOD1 maturation and post-translational modification in amyotrophic lateral sclerosis spinal cord**

**Short title: SOD1 biochemistry in post-mortem ALS**

## **SUPPLEMENTARY INFORMATION**

### *Inventory of Supplementary Information*

#### Supplementary Table 1-11

- 1) Demographic and clinical information for human post-mortem tissue cases.
- 2) Demographic statistics for diagnostic groups.
- 3) Primary antibody details and applications.
- 4) Voltage and current settings for native isoelectric focussing experiments.
- 5) Chromatographic gradient employed for the separation of peptides using high performance liquid chromatography prior to tandem mass spectrometry.
- 6) Parameters for the quantification of SOD1 peptides by parallel reaction monitoring (PRM) and liquid chromatography-mass spectrometry (LC-MS).
- 7) Immunoprecipitation did not alter levels of post-translational modifications of interest on a commercially available human SOD1 standard.
- 8) Complete details of statistical tests used to analyse PTMs of interest between ALS subgroups and controls.
- 9) Summary of alterations to SOD1 PTMs in the ventral spinal cord of familial (f)ALS and sporadic (s)ALS cases.
- 10) Characterization and quantification of spinal cord motor neuron (MN) CCS inclusions, as well as diffuse cytosolic and granular cytoplasmic CCS staining, in seven-micron paraffin-embedded formalin-fixed tissue sections of the cervical and thoracic spinal cord from all post-mortem tissue cases.
- 11) Complete details of statistical tests used to identify differences in copper and zinc metal levels in the ventral and dorsal spinal cord between diagnostic groups in each tissue fraction.

#### Supplementary Figures 1-13

- 1) A principal component analysis (PCA) did not identify any sample clustering by age or post mortem interval (PMI).
- 2) A principal component analysis (PCA) found no sample clustering according to sex.
- 3) Validation of fluorescent microscopy workflow.
- 4) Standard curve describing the relationship between % superoxide reduction and SOD1 activity under assay parameters.
- 5) Correlation between SOD1 protein levels and SOD1 immunoblot densitometry.
- 6) GFAP protein levels in the ventral and dorsal spinal cord of all post-mortem cases

- 7) Immunoprecipitation did not alter the metallation or antioxidant activity of a commercially available SOD1 standard.
- 8) The amount of SOD1 protein and its modified peptides are consistent between technical replicates analysed using liquid chromatography-tandem mass spectrometry.
- 9) Standard curves describing the relationship between the amount of glutathione and the rate of increase in absorbance at 412nm wavelength (A412).
- 10) A principal component analysis found no sample clustering according to ventral spinal cord level (cervical vs thoracic).
- 11) Quantification of dorsal horn grey matter volume as an index of neurodegeneration in this region.
- 12) Enzymatically-active, mature SOD1 copper:zinc ratio measured in the control and SOD1-fALS ventral spinal cord (VSpC) and the SOD1-fALS occipital cortex (OCx).
- 13) Additional CCS protein data.

#### Supplementary Blots 1-4

- 1) Figure 2, panel B
- 2) Supplementary Figure 7, panel A
- 3) Supplementary Figure 7, panel B
- 4) Supplementary Figure 13, panel B

**Supplementary Table 1. Demographic and clinical information for human post-mortem tissue cases.**

| Case # | Diagnostic Group             | Age | Sex | PMI  | Site of onset        | Cause of Death                             | Fixed Tissue Regions | Fresh Frozen Tissue Regions |
|--------|------------------------------|-----|-----|------|----------------------|--------------------------------------------|----------------------|-----------------------------|
| 1      | Age-matched Control          | 51  | F   | 33   | N/A                  | Lung Cancer                                | TSpC                 | TSpC, OCx                   |
| 2      | Age-matched Control          | 54  | M   | 30   | N/A                  | Cancer                                     | TSpC                 | TSpC, OCx                   |
| 3      | Age-matched Control          | 73  | F   | 27   | N/A                  | NA                                         | TSpC                 | TSpC, OCx                   |
| 4      | Age-matched Control          | 65  | M   | 25   | N/A                  | Ruptured Aortic Aneurysm                   | TSpC, CSpC           | TSpC, CSpC, OCx             |
| 5      | Age-matched Control          | 50  | M   | 24   | N/A                  | Atherosclerotic Cardiovascular Disease     | TSpC                 | TSpC, CSpC, OCx             |
| 6      | Age-matched Control          | 48  | M   | 22   | N/A                  | Hypertensive Atherosclerosis Heart Disease | TSpC, CSpC           | TSpC, CSpC, OCx             |
| 7      | Age-matched Control          | 49  | F   | 26   | N/A                  | Hypertensive Atherosclerosis Heart Disease | TSpC                 | TSpC, CSpC, OCx             |
| 8      | Age-matched Control          | 55  | M   | 23   | N/A                  | Cardiac Arrhythmia (Cardiomegaly)          | TSpC, CSpC           | TSpC, CSpC, OCx             |
| 9      | Age-matched Control          | 49  | M   | 22   | N/A                  | Cardiac Tamponade                          | TSpC, CSpC           | TSpC, CSpC, OCx             |
| 10     | Age-matched Control          | 50  | M   | 22   | N/A                  | Hypertensive Atherosclerosis Heart Disease | TSpC, CSpC           | TSpC, CSpC, OCx             |
| 11     | fALS (SOD1, I113T)           | 47  | M   | 13.5 | Bulbar               | Complication of Disorder                   | TSpC                 | TSpC, OCx, OCx              |
| 12     | fALS (SOD1, I113T)           | 70  | F   | 56   | Bulbar               | Complication of Disorder                   | TSpC                 | TSpC, OCx, OCx              |
| 13     | fALS (SOD1, D101G)           | 46  | F   | 5    | Limb - upper         | Complication of Disorder                   | TSpC                 | TSpC, OCx, OCx              |
| 14     | fALS (C9ORF72, 30+ positive) | 64  | M   | 68   | Bulbar               | Complication of Disorder                   | TSpC                 | TSpC, OCx                   |
| 15     | fALS (C9ORF72, 30+ positive) | 62  | M   | 20   | Bulbar               | Complication of Disorder                   | TSpC, CSpC           | TSpC, CSpC, OCx             |
| 16     | fALS (C9ORF72, 30+ positive) | 55  | M   | 24   | Limb - upper (right) | Complication of disorder                   | TSpC, CSpC           | TSpC, CSpC, OCx             |
| 17     | fALS (unknown mutation)      | 65  | M   | 7    | Limb - lower (left)  | Complication of Disorder                   | TSpC, CSpC           | TSpC, CSpC, OCx             |
| 18     | sALS                         | 70  | F   | 15   | Limb - upper         | Complication of Disorder                   | TSpC                 | TSpC, OCx                   |
| 19     | sALS                         | 50  | F   | 56   | Limb - lower         | Complication of Disorder                   | TSpC                 | TSpC, OCx                   |

|    |      |    |   |    |                        |                          |            |                 |
|----|------|----|---|----|------------------------|--------------------------|------------|-----------------|
| 20 | sALS | 68 | F | 17 | Limb - lower           | Complication of Disorder | TSpC       | TSpC, CSpC, OCx |
| 21 | sALS | 54 | F | 12 | Limb - upper and lower | Complication of Disorder | TSpC, CSpC | TSpC, CSpC, OCx |
| 22 | sALS | 56 | M | 22 | Limb - lower           | Complication of Disorder | NA         | TSpC, CSpC, OCx |
| 23 | sALS | 68 | M | 4  | Limb - upper and lower | Complication of Disorder | TSpC, CSpC | TSpC, CSpC, OCx |
| 24 | sALS | 57 | F | 20 | Limb - lower (right)   | Complication of Disorder | TSpC, CSpC | TSpC, CSpC, OCx |
| 25 | sALS | 62 | M | 4  | Bulbar                 | Complication of Disorder | TSpC, CSpC | TSpC, CSpC, OCx |
| 26 | sALS | 70 | F | 29 | Limb - lower           | Complication of Disorder | NA         | TSpC, CSpC, OCx |

**Abbreviations:** CSpC, cervical spinal cord; fALS, familial amyotrophic lateral sclerosis; F, female; M, male; MRC, MRC London Neurodegenerative Diseases Brain Bank; NIH, National Institute of Health NeuroBioBank; N/A, not applicable; NA, not available; OCx, occipital cortex; PMI, post-mortem interval; sALS, sporadic amyotrophic lateral sclerosis; TSpC, thoracic spinal cord.

**Supplementary Table 2. Demographic statistics for diagnostic groups.**

|                    | Diagnostic group |           |               |           | Significantly different?     |
|--------------------|------------------|-----------|---------------|-----------|------------------------------|
|                    | Control          | SODI-fALS | Non-SODI-fALS | sALS      |                              |
| <b>n</b>           | 10               | 3         | 4             | 9         | N/A                          |
| <b>Sex (M:F)</b>   | 7:3              | 1:2       | 4:0           | 4:5       | CD <sup>a</sup>              |
| <b>Age (years)</b> | 54.4±2.6         | 54.3±7.8  | 61.5±2.3      | 61.67±2.6 | N.S. (p = 0.14) <sup>b</sup> |
| <b>[range]</b>     | [48-73]          | [46-70]   | [55-65]       | [50-70]   |                              |
| <b>PMI (hrs)</b>   | 25.4±1.2         | 24.8±15.8 | 29.8±13.3     | 19.9±5.3  | N.S. (p = 0.23) <sup>b</sup> |

**Footnotes:** <sup>a</sup> Chi-square test, <sup>b</sup> Kruskal-Wallis test

**Abbreviations:** CD, could not determine; fALS, familial amyotrophic lateral sclerosis; F, female; M, male; N/A, not applicable; N.S., not significant; PMI, post-mortem interval; sALS, sporadic amyotrophic lateral sclerosis.

**Supplementary Table 3. Primary antibody details and applications.**

| Antibody          | Source (cat#)                                              | Class | Host | Species reactivity | Immunogen                                                       | Application | Dilution         |
|-------------------|------------------------------------------------------------|-------|------|--------------------|-----------------------------------------------------------------|-------------|------------------|
| SODI <sub>1</sub> | Merck Millipore, Billerica, MA, USA (574597)               | P     | Sh   | Hu, Mn, Rat, Ms    | Highly purified, human erythrocyte SODI                         | IHC         | 1:200            |
| SODI <sub>2</sub> | Biolegend, San Diego, CA, USA (850701)                     | M     | Ms   | Hu, Ms, Rat        | Purified full length human SODI expressed in 293T cells         | IB<br>IHC   | 1:5,000<br>1:500 |
| SODI <sub>3</sub> | Enzo Life Sciences, Farmingdale, NY, USA (ADI-SOD-100)     | P     | Rb   | Hu, Ms, Rat        | Native human Cu/Zn SOD                                          | IP          | N/A              |
| DisSODI (B8H10)   | Medimabs Inc, Quebec, Canada (MM-0070-P)                   | M     | Ms   | Hu                 | Recognizes misfolded forms of mutant human SODI protein         | IHC         | 1:200            |
| DisSODI (EDI)     | StressMarq Biosciences, British Columbia, Canada (SPC-206) | P     | Rb   | Hu, Ms, Rat        | N-terminal region, SODI protein with exposed dimer interface    | IHC         | 1:200            |
| DisSODI (UβB)     | StressMarq Biosciences, British Columbia, Canada (SPC-205) | P     | Rb   | Hu, Ms, Rat        | N-terminal region, SODI protein with unfolded β-barrel          | IHC         | 1:200            |
| CCS <sub>1</sub>  | Santa Cruz, Dallas, Texas, USA (sc-55561)                  | M     | Ms   | Hu, Ms, Rat        | Amino acids 1-274 representing full length CCS of human origin. | IHC<br>IB   | 1:100<br>1:1,000 |
| CCS <sub>2</sub>  | Sigma-Aldrich, St. Louis, MO, USA (SAB1406905)             | P     | Ms   | Hu                 | Amino acids 1-274 representing full length CCS of human origin. | IHC         | 1:100            |
| GFAP              | Sigma-Aldrich, St. Louis, MO, USA (G3893)                  | M     | MS   | Hu, Rat            | GFAP from pig spinal cord                                       | IB          | 1:30,000         |
| TUJ-1             | Biolegend, San Diego, CA, USA (801213)                     | M     | Ms   | Hu, Ms, Rat        | The last 15 C terminal residues of neuron-specific β3-tubulin   | IHC         | 1:500            |

**Abbreviations:** CCS, copper chaperone for SODI; DisSODI, structurally-disordered SODI; Hu, human; IB, immunoblotting; IHC, immunohistochemistry; IP, immunoprecipitation; Mn, monkey; M, monoclonal; Ms, mouse; P, polyclonal; Rb, rabbit; Sh, sheep; SODI, superoxide dismutase I.

**Supplementary Table 4. Voltage and current settings for native isoelectric focussing experiments.**

| <b>Step</b> | <b>Voltage (V)</b> | <b>Rapid/slow<br/>ramp</b> | <b>Time /<br/>kVhrs</b> |
|-------------|--------------------|----------------------------|-------------------------|
| 1           | 200                | Rapid                      | 20 min                  |
| 2           | 450                | Rapid                      | 15 min                  |
| 3           | 750                | Rapid                      | 15 min                  |
| 4           | 2000               | Rapid                      | 12 kVh                  |
| 5           | 200                | Rapid                      | 12 hrs                  |

**Supplementary Table 5. Chromatographic gradient employed for the separation of peptides using high performance liquid chromatography prior to tandem mass spectrometry.** Solvent A, 0.1% formic acid in MilliQ water; solvent B, 0.1% formic acid in 80% ACN diluted with MilliQ water.

| <b>Step</b> | <b>Time (min)</b> | <b>Flow (nL/min)</b> | <b>%B</b> |
|-------------|-------------------|----------------------|-----------|
| 1           | 0                 | 450                  | 5         |
| 2           | 11                | 450                  | 5         |
| 3           | 11.1              | 300                  | 5         |
| 4           | 13                | 300                  | 5         |
| 5           | 70                | 300                  | 50        |
| 6           | 75                | 300                  | 98        |
| 7           | 78                | 450                  | 98        |
| 8           | 89                | 450                  | 98        |
| 9           | 90                | 450                  | 5         |



**Supplementary Table 6. Parameters for the quantification of SOD1 peptides by parallel reaction monitoring (PRM) and liquid chromatography-mass spectrometry (LC-MS).** Free thiol (NEM) and reversibly modified (MMTS) Cys peptides were quantified by PRM. Unmodified peptides were monitored for normalisation; Cys Modification, alkylating agent present at Cys residue; Precursor mass, mass of the modified peptide precursor ion in daltons (Da); Precursor charge, charge state of modified peptide precursor ion; Precursor m/z, mass to charge ratio of modified peptide precursor ion; Transitions quantified, fragment ions originating from modified precursor ion used for quantitation, charge state of transition denoted by +.

| Peptide Sequence                  | Cys Modification | Precursor Mass (Da) | Precursor Charge | Precursor m/z | Transitions Quantified                                                                                                                                                                                                                                                                                                                   |
|-----------------------------------|------------------|---------------------|------------------|---------------|------------------------------------------------------------------------------------------------------------------------------------------------------------------------------------------------------------------------------------------------------------------------------------------------------------------------------------------|
| GLTEGLHGFHVHEFGDNTAGCTSAGPHFNPLSR | MMTS             | 3511.613            | 4                | 877.903       | y15+, y14+, y12+, y11+, y10+, y9+, y7+, y6+, y5+, y4+, y2+, y26++, y23++, y22++, y21++, y20++, y19++, y18++, y17++, y16++, y15++, y14++, y13++, y12++, y11+, y10+, y9++, y8++, y7++, b3+, b5+, b6+, b7+, b8+, b9+, b10+, b11+, b12+, b13+, b14+, b8++, b11+, b12++, b13++, b14++, b15++, b16++, b17++, b18++, b19++, b20++, b21++, b25++ |
| GLTEGLHGFHVHEFGDNTAGCTSAGPHFNPLSR | NEM              | 3590.673            | 4                | 897.668       | y9+, y5+, y22++, y21++, y19++, y17++, y15++, y14++, y9++, y8++, b7+, b10+, b11+, b12++, b13++, b21++                                                                                                                                                                                                                                     |
| LACGVIGIAQ                        | MMTS             | 991.518             | 2                | 495.759       | y4+, y2+, y1+, b4+, b5+, b7+                                                                                                                                                                                                                                                                                                             |
| LACGVIGIAQ                        | NEM              | 1070.578            | 2                | 535.289       | y2+, y1+, b4+, b5+, b7+                                                                                                                                                                                                                                                                                                                  |
| GDGPVQGIINFEQK                    | None             | 1502.772            | 2                | 751.386       | y10+, y9+, y8+, y7+, y6+, y5+, y3+, y2+, y11+, b2+, b3+, b4+, b5+, b6+, b8+, b3++, b8++                                                                                                                                                                                                                                                  |
| HVGD LGNVTADK                     | None             | 1226.624            | 2                | 613.312       | y11+, y10+, y8+, y4+, b1+, b2+, b7+                                                                                                                                                                                                                                                                                                      |

**Supplementary Table 7. Immunoprecipitation did not alter levels of post-translational modifications of interest on a commercially available human SOD1 standard.** Statistical comparisons were performed using pairwise Mann-Whitney U tests for each PTM of interest at each residue, between protein aliquots that had ( $n = 3$ ), and had not ( $n = 4$ ), been immunoprecipitated.

| PTM                    | Residue | Mann-Whitney U | p value |
|------------------------|---------|----------------|---------|
| 3DG-H (Arg)            | Arg115  | 0              | 0.13    |
|                        | Arg69   | 3              | >0.99   |
|                        | Arg143  | 2              | 0.23    |
| Acetylation (Lys)      | Lys3    | 4              | >0.99   |
|                        | Lys9    | 3              | 0.40    |
|                        | Lys30   | 0              | 0.06    |
|                        | Lys91   | 2              | 0.40    |
|                        | Lys122  | 2              | 0.40    |
| CEL (Lys)              | Lys136  | 0              | 0.13    |
|                        | Lys9    | 3              | 0.40    |
|                        | Lys70   | 2              | 0.23    |
| CML (Lys)              | Lys9    | 1              | 0.20    |
|                        | Lys91   | 2              | 0.23    |
|                        | Lys122  | 0              | 0.06    |
| Deamidation (Asn, Gln) | Asn131  | 3              | 0.40    |
|                        | Asn139  | 1              | 0.11    |
|                        | Asn19   | 0              | 0.06    |
|                        | Asn26   | 3              | 0.40    |
|                        | Asn86   | 3              | 0.40    |
|                        | Asn53   | 0              | 0.06    |
|                        | Asn65   | 2              | 0.53    |
|                        | Gln15   | 2              | 0.23    |
|                        | Gln22   | 0              | 0.06    |
| MG-H (Arg)             | Arg143  | 3              | 0.40    |
|                        | Arg69   | 0              | 0.06    |
|                        | Arg115  | 2              | 0.23    |
| Nitration (Trp)        | Trp32   | 5              | 0.86    |
| Oxidation (His, Trp)   | His80   | 0              | 0.06    |
|                        | His110  | 5              | 0.86    |
|                        | His43   | 4              | 0.63    |

|                      |        |   |       |
|----------------------|--------|---|-------|
|                      | His46  | 5 | 0.86  |
|                      | His48  | 4 | 0.63  |
|                      | His63  | 1 | 0.11  |
|                      | His120 | 3 | 0.40  |
|                      | Trp32  | 1 | 0.11  |
| Succinylation (Lys)  | Lys3   | 2 | 0.53  |
|                      | Lys9   | 5 | 0.86  |
|                      | Lys91  | 2 | 0.40  |
|                      | Lys122 | 1 | 0.40  |
| Ubiquitination (Lys) | Lys91  | 4 | >0.99 |

**Abbreviations:** 3-DG-H, 3-deoxyglucosone-derived hydroimidazolone; CEL, carboxyethyllysine; CML, carboxymethyllysine; MG-H, methylglyoxal-derived hydroimidazolone.

**Supplementary Table 8. Complete details of statistical tests used to analyse PTMs of interest between ALS subgroups and controls.**

| PTM         | Residue | Tissue region              | Significant variation between groups? | Significant differences in pairwise comparisons? | Test employed           | Test statistic(s)   | p value(s) - ANOVA (post-hoc) | Fold change vs control |
|-------------|---------|----------------------------|---------------------------------------|--------------------------------------------------|-------------------------|---------------------|-------------------------------|------------------------|
| 3 DG-H      | Arg115  | VSpC                       | No                                    | No                                               | ANOVA                   | F = 1.764           | 0.19                          | N/A                    |
| AAAA        | Lys70   | VSpC                       | No                                    | No                                               | Kruskal-Wallis          | H = 3.763           | 0.29                          | N/A                    |
| Acetylation | Lys3    | VSpC                       | Yes                                   | Yes - ↓ sALS vs Ct                               | Kruskal-Wallis w Dunn's | H = 7.494           | <b>0.01 (0.03)</b>            | 1.9                    |
|             |         | DSpC                       |                                       |                                                  |                         |                     |                               |                        |
|             | Lys9    | VSpC                       | No                                    | No                                               | Kruskal-Wallis          | H = 0.739           | 0.71                          | N/A                    |
|             | Lys91   | VSpC                       | No                                    | No                                               | Kruskal-Wallis          | H = 1.500           | 0.77                          | N/A                    |
| Allysine    | Lys70   | VSpC                       | No                                    | No                                               | ANOVA                   | F = 1.199           | 0.34                          | N/A                    |
|             | Lys91   | VSpC                       | No                                    | No                                               | ANOVA                   | F = 0.4433          | 0.72                          | N/A                    |
| CEL         | Lys9    | VSpC                       | No                                    | No                                               | Unpaired t-test         | t=0.8771, df=5      | 0.42                          | N/A                    |
|             |         | Lys122                     | VSpC                                  | No                                               | Yes - ↑ SOD1-fALS vs Ct | ANOVA, Mann-Whitney | F = 2.034 (U = 0)             | 0.15 ( <b>0.036</b> )  |
|             | DSpC    | <b>PTMs not identified</b> |                                       |                                                  |                         |                     |                               |                        |
|             | Lys128  | VSpC                       | No                                    | Yes - ↑ SOD1-fALS vs Ct                          | ANOVA, Mann-Whitney     | F = 2.034 (U = 0)   | 0.15 ( <b>0.036</b> )         | 2.04                   |
|             |         | DSpC                       | <b>PTMs not identified</b>            |                                                  |                         |                     |                               |                        |

|                |                             |      |     |                         |                         |            |                                |      |
|----------------|-----------------------------|------|-----|-------------------------|-------------------------|------------|--------------------------------|------|
| CML            | Lys9                        | VSpC | No  | No                      | ANOVA                   | F = 0.4420 | 0.73                           | N/A  |
|                | Lys70                       | VSpC | No  | No                      | Kruskal-Wallis          | H = 4.642  | 0.21                           | N/A  |
|                | Lys91                       | VSpC | No  | No                      | Kruskal-Wallis          | H = 2.170  | 0.54                           | N/A  |
|                | Lys122                      | VSpC | No  | No                      | Kruskal-Wallis          | H = 2.280  | 0.55                           | N/A  |
|                | Lys128                      | VSpC | No  | No                      | Kruskal-Wallis          | H = 1.286  | 0.91                           | N/A  |
| Cysteine redox | Cys57 (MMTS <sup>a</sup> )  | VSpC | Yes | Yes - ↑ cluster vs Ct   | ANOVA w Dunnet's        | F = 8.075  | <b>&lt;0.0001 (&lt;0.0001)</b> | 2    |
|                | Cys57 (NEM <sup>b</sup> )   | VSpC | Yes | Yes - ↓ cluster vs Ct   | Kruskal-Wallis w Dunn's | H = 9.373  | <b>0.03 (0.032)</b>            | 8.7  |
|                | Cys146 (MMTS <sup>a</sup> ) | VSpC | Yes | Yes - ↑ cluster vs Ct   | ANOVA w Dunnet's        | F = 63.2   | <b>&lt;0.0001 (&lt;0.0001)</b> | 4    |
|                | Cys146 (NEM <sup>b</sup> )  | VSpC | No  | Yes - ↓ cluster vs Ct   | Kruskal-Wallis w Dunn's | H = 8.792  | <b>0.08 (0.04)</b>             | 7.2  |
| Deamidation    | Gln15                       | VSpC | Yes | Yes - ↑ SOD1-fALS vs Ct | ANOVA w Dunnet's        | F = 3.366  | <b>0.04 (0.039)</b>            | 2.23 |
|                |                             | DSpC | No  | No                      | ANOVA w Dunnet's        | F = 1.174  | 0.34 (>0.99)                   | N/A  |
|                | Asn19                       | VSpC | Yes | No                      | Kruskal-Wallis w Dunn's | H = 8.314  | <b>0.04 (0.075)</b>            | N/A  |
|                | Gln22                       | VSpC | Yes | No                      | ANOVA w Dunnet's        | F = 4.732  | <b>0.012</b>                   | N/A  |

|           |        |      |     |                         |                                |            |                                          |       |
|-----------|--------|------|-----|-------------------------|--------------------------------|------------|------------------------------------------|-------|
|           | Asn26  | VSpC | Yes | Yes - ↑ SODI-fALS vs Ct | ANOVA w<br>Dunnet's            | F = 5.180  | <b>0.0074</b><br><b>(0.037)</b>          | 1.94  |
|           |        | DSpC | No  | No                      | Kruskal-<br>Wallis w<br>Dunn's | H = 4.359  | 0.23 (0.21)                              | N/A   |
|           | Asn53  | VSpC | Yes | Yes - ↑ SODI-fALS vs Ct | ANOVA w<br>Dunnet's            | F = 31.20  | <b>&lt;0.0001</b><br><b>(&lt;0.0001)</b> | 10.18 |
|           |        | DSpC | No  | No                      | Kruskal-<br>Wallis w<br>Dunn's | H = 4.868  | 0.18 (0.12)                              | N/A   |
|           | Asn65  | VSpC | No  | No                      | Kruskal-<br>Wallis w<br>Dunn's | H = 5.222  | 0.12                                     | N/A   |
|           | Asn86  | VSpC | No  | No                      | Kruskal-<br>Wallis             | H = 4.497  | 0.21                                     | N/A   |
|           | Asn131 | VSpC | Yes | Yes - ↑ SODI-fALS vs Ct | ANOVA w<br>Dunnet's            | F = 7.802  | <b>0.0011</b><br><b>(0.0005)</b>         | 12.71 |
|           |        | DSpC | No  | No                      | Kruskal-<br>Wallis w<br>Dunn's | H = 3.670  | 0.30 (0.57)                              | N/A   |
|           | Asn139 | VSpC | Yes | No                      | Kruskal-<br>Wallis w<br>Dunn's | H = 7.267  | <b>0.042</b>                             | N/A   |
| Nitration | Trp32  | VSpC | Yes | Yes - ↑ sALS vs Ct      | Kruskal-<br>Wallis w<br>Dunn's | H = 8.209  | <b>0.0043</b><br><b>(0.019)</b>          | 3.41  |
|           |        | DSpC | No  | No                      | Kruskal-<br>Wallis w<br>Dunn's | H = 0.904  | 0.85 (>0.99)                             | N/A   |
| Oxidation | His43  | VSpC | No  | No                      | ANOVA                          | F = 0.6673 | 0.52                                     | N/A   |

|                 |        |      |     |                             |                         |                |                       |      |
|-----------------|--------|------|-----|-----------------------------|-------------------------|----------------|-----------------------|------|
|                 | His46  | VSpC | No  | No                          | ANOVA                   | F = 2.783      | 0.066                 | N/A  |
|                 | His48  | VSpC | Yes | Yes - ↑ Zn-def. hSODI vs Ct | ANOVA w Dunnet's        | F = 7.563      | <b>0.0032 (0.044)</b> | 1.8  |
|                 |        | DSpC | No  | No                          | ANOVA w Dunnet's        | F = 1.862      | 0.17 (0.11)           | N/A  |
|                 | His63  | VSpC | Yes | Yes - ↑ Zn-def. hSODI vs Ct | ANOVA w Dunnet's        | F = 10.44      | <b>0.0006 (0.013)</b> | 1.9  |
|                 |        | DSpC | Yes | Yes - ↑ SODI-fALS vs Ct     | ANOVA w Dunnet's        | F = 3.322      | <b>0.039 (0.015)</b>  | 2.3  |
|                 | His80  | VSpC | No  | No                          | ANOVA                   | F = 1.385      | 0.27                  | N/A  |
|                 | His110 | VSpC | No  | No                          | ANOVA                   | F = 2.058      | 0.15                  | N/A  |
|                 | His120 | VSpC | No  | No                          | ANOVA                   | F = 0.4128     | 0.67                  | N/A  |
|                 | Trp32  | VSpC | No  | Yes - ↑ SODI-fALS vs Ct     | Unpaired t-test         | t=2.265, df=10 | <b>0.047</b>          | 1.63 |
|                 |        | DSpC | No  | No                          | Kruskal-Wallis w Dunn's | H = 1.694      | 0.61 (>0.99)          | N/A  |
| Phosphorylation | Ser98  | VSpC | Yes | Yes - ↓ sALS vs Ct          | Kruskal-Wallis w Dunn's | H = 8.018      | <b>0.002 (0.0093)</b> | 3.81 |
|                 |        | DSpC | Yes | Yes - ↑ sALS vs Ct          | Kruskal-Wallis w Dunn's | H = 9.018      | <b>0.029 (0.021)</b>  | 2    |
|                 | Ser102 | VSpC | No  | No                          | Kruskal-Wallis          | H = 5.475      | 0.13                  | N/A  |
|                 | Ser107 | VSpC | No  | No                          | Kruskal-Wallis          | H = 0.2667     | 0.93                  | N/A  |

|                |       |      |     |                         |                            |            |                            |      |
|----------------|-------|------|-----|-------------------------|----------------------------|------------|----------------------------|------|
| Succinylation  | Lys9  | VSpC | Yes | No                      | Kruskal-Wallis w<br>Dunn's | H = 6.600  | <b>0.05</b>                | N/A  |
|                | Lys9I | VSpC | No  | No                      | Kruskal-Wallis             | H = 0.5556 | 0.84                       | N/A  |
| Ubiquitylation | Lys9  | VSpC | No  | No                      | Kruskal-Wallis             | H = 5.284  | 0.15                       | N/A  |
|                | Lys9I | VSpC | Yes | Yes - ↑ SODI-fALS vs Ct | ANOVA w<br>Dunnet's        | F = 8.944  | <b>0.0008<br/>(0.0027)</b> | 2.53 |
|                |       | DSpC | No  | No                      | ANOVA w<br>Dunnet's        | F = 1.371  | 0.28 (0.99)                | N/A  |

**Footnotes:** <sup>a</sup> MMTS modifications to Cys residues signify reversible modifications to the residue *in vivo*, <sup>b</sup> NEM modifications to Cys residues indicate that the residue was unmodified *in vivo*.

**Abbreviations:** 3-DG-H, 3-deoxyglucosone-derived hydroimidazolone; AAAA, α-amino adipic acid; CEL, carboxyethyllysine; CML, carboxymethyllysine; Ct, control; DSpC, dorsal spinal cord; N/A, not applicable; PTM, post-translational modification; SODI-fALS, SODI-linked familial amyotrophic lateral sclerosis; sALS, sporadic amyotrophic lateral sclerosis; VSpC, ventral spinal cord.



**Supplementary Table 9. Summary of alterations to SOD1 PTMs in the ventral spinal cord of familial (f)ALS and sporadic (s)ALS cases.** Levels of histidine (His) and tryptophan (Trp) oxidation (Oxid.), Trp nitration (Nitr.), lysine (Lys) acetylation (Acet.), serine (Ser) phosphorylation (Phos.), glutamine (Gln) and asparagine (Asn) deamidation (Deam.), carboxyethyllysine (CEL), Lys ubiquitin footprint (Gly-Gly) and reversible (Revers.) modification of cysteine residues (Cys) varied significantly in individual ALS cases, and between ALS cases and controls. Arrows indicate significant increases or decreases in PTM levels compared with age-matched controls. Complete statistical test results are presented in **Supplementary Table 3**. Results from the quantification of SOD1 pathology (**Table 1**), SOD1 specific activity, and active SOD1 Cu:Zn and pl are included for comparisons. SOD1 pathology quantification classifications; + = >0-25%, ++ = 26-50%, +++ = 51-75%, ++++ = 76-100%.

| Case # | Diagnostic Group    | SOD1 Path. | SOD1 spec. act. | Active SOD1 Cu:Zn | Active SOD1 pl | Oxid. His48, His63 | Oxid. Trp32 | Nitr. Trp32 | Acet. Lys3 | Phos. Ser98 | Deam. Gln15, Asn26, Asn53, Asn131 | CEL Lys122, Lys128 | Gly-Gly Lys91 | Revers. Cys57, Cys146 |
|--------|---------------------|------------|-----------------|-------------------|----------------|--------------------|-------------|-------------|------------|-------------|-----------------------------------|--------------------|---------------|-----------------------|
| 11     | fALS (SOD1, II I3T) | ++++       | ↓               | ↓                 | ↑↑             | ↑                  | ↑           | ND          | -          | ND          | ↑                                 | ↑                  | ↑             | ↑                     |
| 12     | fALS (SOD1, II I3T) | ++++       | ↓               | -                 | ↑↑             | -                  | ↑           | -           | ND         | ND          | ↑                                 | ↑                  | ↑             | ↑                     |
| 13     | fALS (SOD1, DI01G)  | ++++       | ↓               | ↓                 | ↑↑             | ↑                  | ↑           | -           | -          | ND          | ↑                                 | ↑                  | ↑             | ↑                     |
| 14     | fALS (C9ORF72)      | +          | ↓               | ↓                 | ↑↑             | ↑                  | -           | -           | ND         | -           | -                                 | ND                 | -             | ND                    |
| 15     | fALS (unknown)      | ++         | ↓               | -                 | ↑              | -                  | -           | ND          | -          | -           | -                                 | -                  | -             | -                     |
| 16     | fALS (C9ORF72)      | +          | ↓               | -                 | ↑              | -                  | -           | ND          | ND         | ND          | -                                 | -                  | -             | -                     |
| 17     | fALS (C9ORF72)      | +          | ↓               | NA                | ↑              | -                  | -           | ND          | ND         | ND          | -                                 | -                  | -             | -                     |
| 18     | sALS                | ++++       | ↓               | -                 | ↑              | -                  | -           | ↑           | ↓          | ND          | -                                 | ND                 | -             | ↑                     |
| 19     | sALS                | +          | ↓               | NA                | ↑              | -                  | -           | ↑           | ND         | ↓           | -                                 | ND                 | -             | ND                    |
| 20     | sALS                | ++         | ↓               | -                 | ↑              | -                  | -           | ↑           | ↓          | ND          | -                                 | -                  | ND            | -                     |
| 21     | sALS                | +          | ↓               | NA                | ↑              | -                  | -           | ND          | ND         | ND          | -                                 | ND                 | -             | -                     |
| 22     | sALS                | +          | ↓               | ↓                 | ↑↑             | ↑                  | -           | ND          | ↓          | ↓           | -                                 | -                  | -             | -                     |
| 23     | sALS                | ++         | ↓               | -                 | ↑              | -                  | -           | ↑           | ↓          | ↓           | -                                 | -                  | -             | -                     |
| 24     | sALS                | +          | ↓               | NA                | ↑              | -                  | -           | ↑           | ↓          | ND          | -                                 | -                  | -             | -                     |
| 25     | sALS                | ++         | ↓               | NA                | ↑              | -                  | -           | ND          | ND         | ND          | -                                 | ND                 | -             | ND                    |
| 26     | sALS                | NA         | ↓               | ↓                 | ↑↑             | ↑                  | -           | ND          | ↓          | ↓           | -                                 | -                  | -             | -                     |

**Abbreviations:** - ; no difference compared with controls; NA, tissue not available; ND, PTM not detected.

**Supplementary Table 10. Characterization and quantification of spinal cord motor neuron (MN) CCS inclusions, as well as diffuse cytosolic and granular cytoplasmic CCS staining, in seven-micron paraffin-embedded formalin-fixed tissue sections of the cervical and thoracic spinal cord from all post-mortem tissue cases.** Fixed tissues were not available (NA) for some cases. The four morphologies of CCS pathology were noted as present (√) or absent (-), and the proportion of motor neurons exhibiting any of the four morphologies quantified. The number of motor neurons exhibiting granular disordered CCS immunostaining was also quantified within each spinal cord ventral horn, expressed as a proportion of the total number of motor neurons in that ventral horn. Quantification classifications; - = 0%, + = >0-25%, ++ = 26-50%, +++ = 51-75%, ++++ = 76-100%.

| Case # | Diagnostic Group    | CCS inclusions |            |          | Intense diffuse staining | Quant. (%MNs)        |          |
|--------|---------------------|----------------|------------|----------|--------------------------|----------------------|----------|
|        |                     | Globular       | Skein-like | Punctate |                          | Inclusions + diffuse | Granular |
| 1      | Age-matched Control | -              | -          | -        | -                        | -                    | ++       |
| 2      | Age-matched Control | NA             | NA         | NA       | NA                       | NA                   | NA       |
| 3      | Age-matched Control | -              | -          | -        | -                        | -                    | ++       |
| 4      | Age-matched Control | -              | -          | -        | -                        | -                    | ++       |
| 5      | Age-matched Control | -              | -          | -        | -                        | -                    | +++      |
| 6      | Age-matched Control | -              | -          | -        | √                        | +                    | ++       |
| 7      | Age-matched Control | -              | -          | -        | √                        | +                    | ++       |
| 8      | Age-matched Control | -              | -          | -        | √                        | +                    | ++       |
| 9      | Age-matched Control | -              | -          | -        | √                        | +                    | ++       |
| 10     | Age-matched Control | -              | -          | -        | √                        | +                    | ++       |
| 11     | fALS (SOD1, II I3T) | √              | -          | √        | √                        | ++++                 | -        |
| 12     | fALS (SOD1, II I3T) | √              | -          | √        | √                        | +++                  | -        |
| 13     | fALS (SOD1, D101G)  | √              | -          | -        | √                        | +++                  | -        |
| 14     | fALS (C9ORF72)      | -              | -          | -        | √                        | +                    | +        |
| 15     | fALS (unknown)      | -              | √          | -        | √                        | ++                   | +        |
| 16     | fALS (C9ORF72)      | -              | -          | -        | √                        | ++++                 | +        |
| 17     | fALS (C9ORF72)      | √              | -          | -        | √                        | +                    | +        |
| 18     | sALS                | √              | -          | -        | √                        | ++++                 | +        |
| 19     | sALS                | -              | -          | √        | √                        | ++                   | -        |
| 20     | sALS                | -              | -          | -        | -                        | -                    | +        |
| 21     | sALS                | NA             | NA         | NA       | NA                       | NA                   | NA       |
| 22     | sALS                | -              | -          | -        | √                        | +                    | +        |
| 23     | sALS                | -              | -          | √        | √                        | -                    | +        |
| 24     | sALS                | -              | -          | -        | √                        | +                    | +        |
| 25     | sALS                | -              | -          | -        | √                        | +                    | +        |
| 26     | sALS                | NA             | NA         | NA       | NA                       | NA                   | NA       |

**Abbreviations:** diff., diffuse; fALS, familial amyotrophic lateral sclerosis; Incl., inclusion; Quant., quantification; sALS, sporadic amyotrophic lateral sclerosis.

**Supplementary Table 11. Complete details of statistical tests used to analyse differences in copper and zinc metal levels in the ventral and dorsal spinal cord between diagnostic groups in each tissue fraction.** All comparisons were analysed using a Two-way ANOVA with Sidak's multiple comparisons post-hoc tests. ANOVA *p* values are listed in brackets following corresponding F statistics, whilst post-hoc *p* values reference comparisons drawn between ALS subgroups and controls, and are listed in brackets following their corresponding diagnostic group.

| Biometal | Tissue fraction | Spinal cord subregion | Significant variation between groups? | ANOVA test statistics - F (p) | Significant differences between ALS subgroups vs controls (p)                        |
|----------|-----------------|-----------------------|---------------------------------------|-------------------------------|--------------------------------------------------------------------------------------|
| Zn       | Whole tissue    | VSpC                  | Yes                                   | 25.42 (<0.0001)               | Yes - ↑ <i>SOD1</i> -fALS (<0.0001), non- <i>SOD1</i> -fALS (0.0001), sALS (<0.0001) |
|          |                 | DSpC                  |                                       |                               | Yes - ↑non- <i>SOD1</i> -fALS (0.0186), sALS (<0.0001)                               |
|          | Soluble         | VSpC                  | Yes                                   | 11.05 (<0.0001)               | Yes - ↑ <i>SOD1</i> -fALS (0.0041), non- <i>SOD1</i> -fALS (0.021), sALS (<0.0001)   |
|          |                 | DSpC                  |                                       |                               | Yes - ↑sALS (0.016)                                                                  |
|          | Insoluble       | VSpC                  | Yes                                   | 20.96 (<0.0001)               | Yes - ↑ <i>SOD1</i> -fALS (0.0003), non- <i>SOD1</i> -fALS (0.0094), sALS (<0.0001)  |
|          |                 | DSpC                  |                                       |                               | Yes - ↑non- <i>SOD1</i> -fALS (0.0149), sALS (0.0003)                                |
| Cu       | Whole tissue    | VSpC                  | No                                    | 1.086 (0.36)                  | No                                                                                   |
|          |                 | DSpC                  |                                       |                               | No                                                                                   |
|          | Soluble         | VSpC                  | Yes                                   | 3.047 (0.034)                 | Yes - ↓ <i>SOD1</i> -fALS (0.048), non- <i>SOD1</i> -fALS (0.011), sALS (0.043)      |
|          |                 | DSpC                  |                                       |                               | No                                                                                   |
|          | Insoluble       | VSpC                  | No                                    | 2.404 (0.074)                 | No                                                                                   |
|          |                 | DSpC                  |                                       |                               | Yes - ↑sALS (0.043)                                                                  |

**Abbreviations:** DSpC, dorsal spinal cord; non-*SOD1*-fALS, non-*SOD1*-linked familial amyotrophic lateral sclerosis; sALS, sporadic amyotrophic lateral sclerosis; *SOD1*-fALS, *SOD1*-linked familial amyotrophic lateral sclerosis; VSpC, ventral spinal cord.

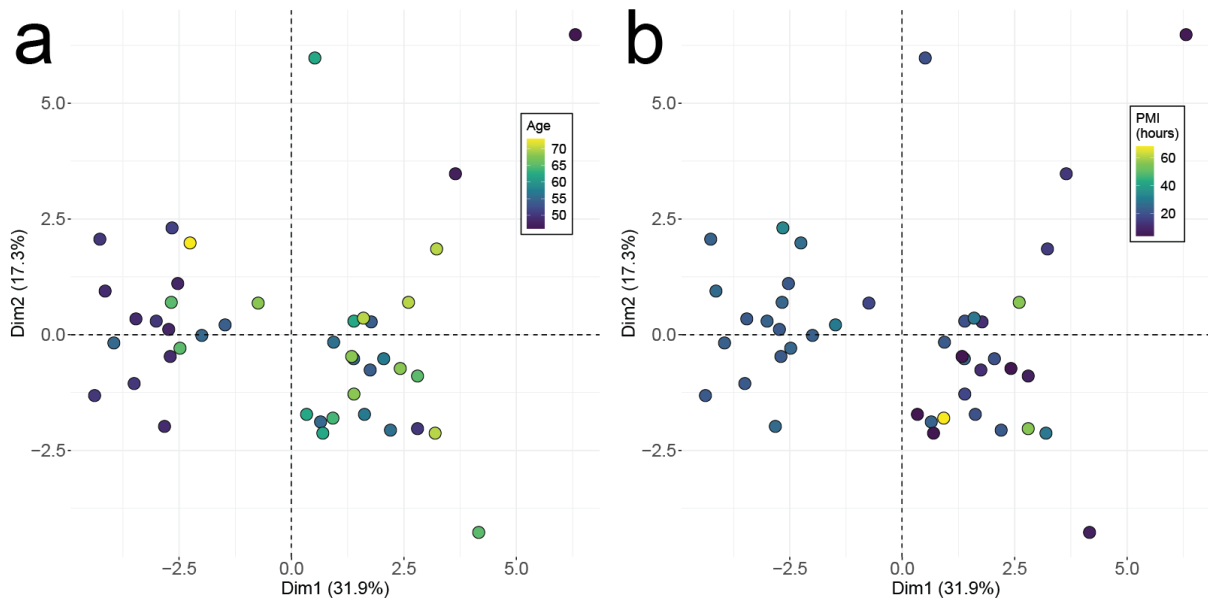

**Supplementary Figure 1. A principal component analysis (PCA) did not identify any sample clustering by age or post mortem interval (PMI). a,b**, PCA plots of cases coloured according to age (a) and PMI (b). Each point represents a ventral spinal cord sample (ALS and control). See methods for complete details of the variables included in this PCA.

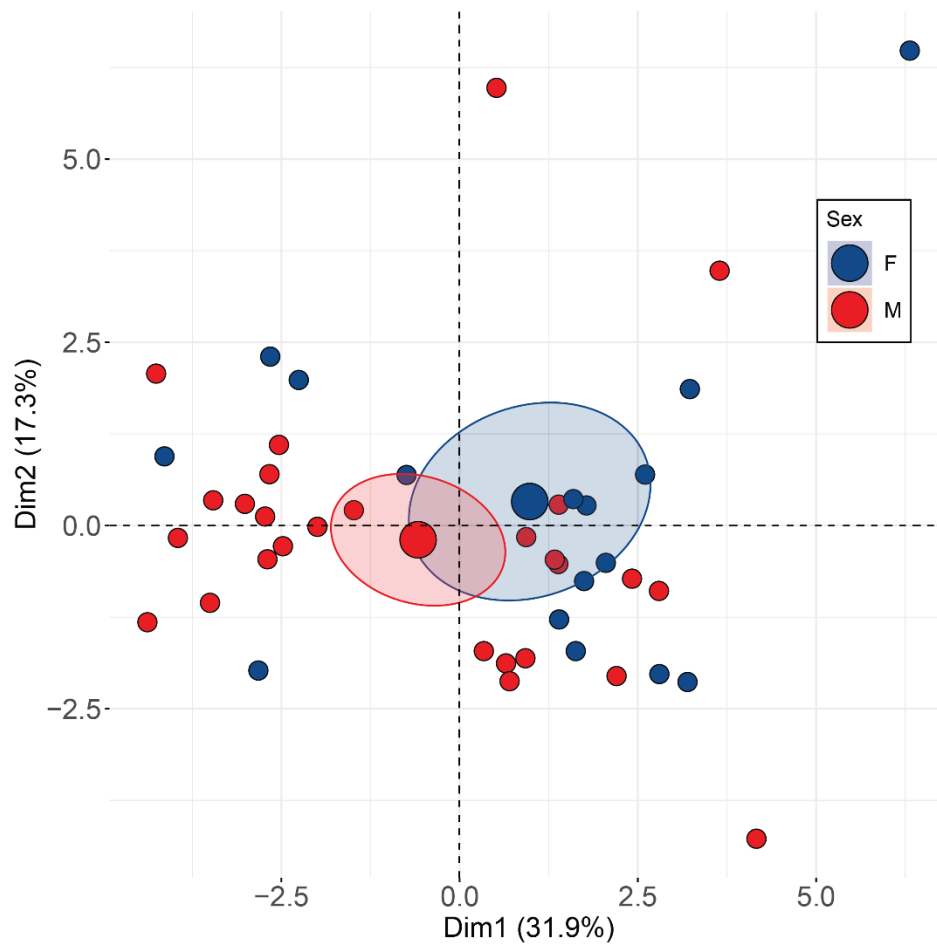

**Supplementary Figure 2. A principal component analysis (PCA) found no sample clustering according to sex.** PCA plot of individual ventral spinal cord samples from control or ALS cases. Blue dots represent samples obtained from females, and red dots are those from males. Large dots with coloured ellipses represent the centroid for that category or grouping and its 95% confidence intervals. See methods for complete details of the variables included in this PCA.

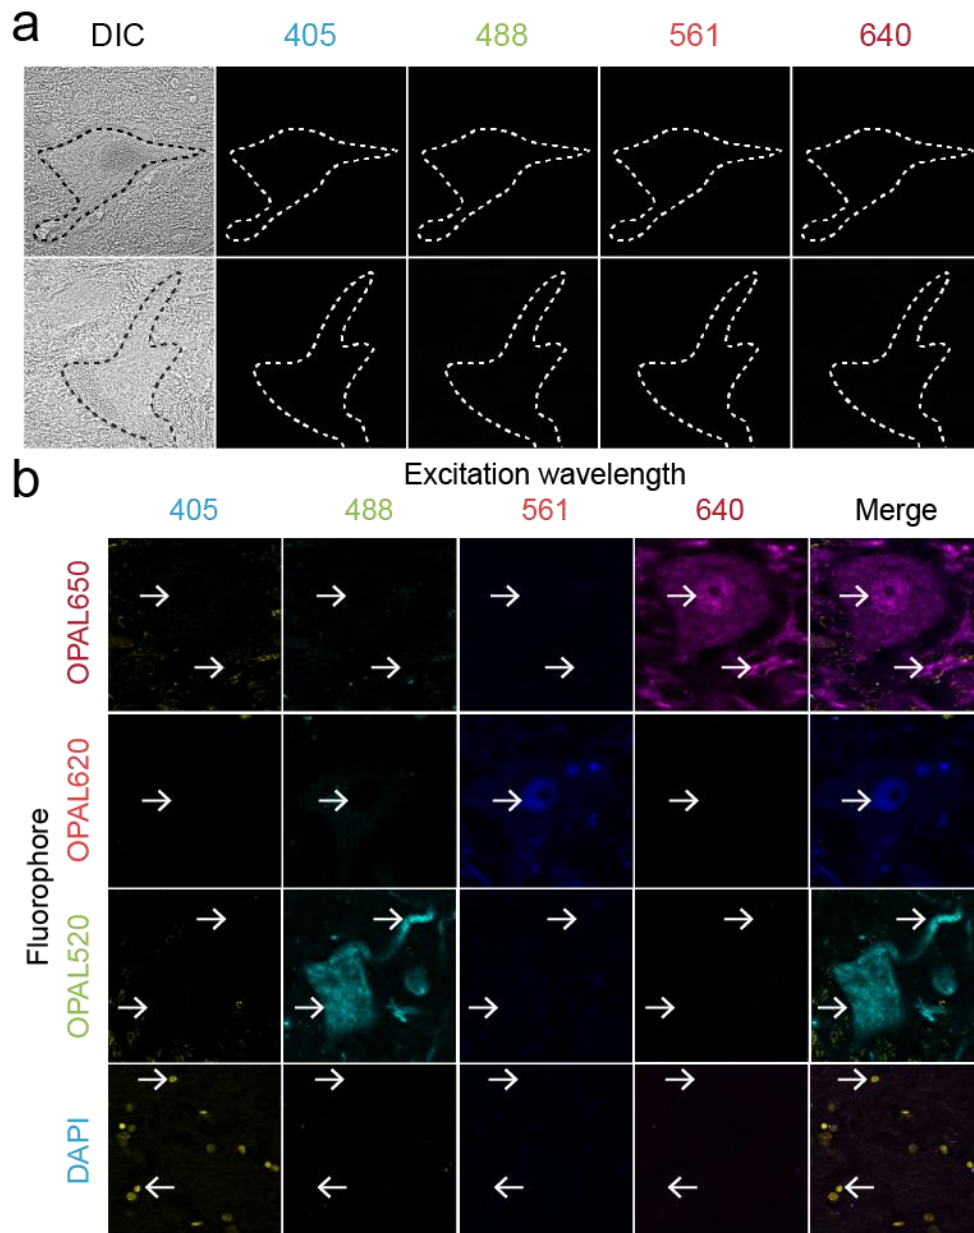

**Supplementary Figure 3. Validation of fluorescent microscopy workflow.** **a.** Characterisation of non-specific binding of secondary antibodies and OPAL fluorophores was performed using control tissue sections processed in the absence of primary antibodies. Negligible fluorescence was observed upon exposure of tissues to characteristic OPAL fluorophore excitation wavelengths, indicating minimal non-specific binding of secondary antibodies and OPAL fluorophores to tissues. **b.** To validate the absence of spectral overlap between our employed fluorophores at the confocal microscope acquisition settings employed in this study, tissue sections were labelled with TUJ-1 primary antibody (Biolegend, USA) and an anti-mouse HRP-conjugated secondary antibody, and were then labelled with individual OPAL fluorophores (OPAL650, OPAL620, OPAL520) or DAPI. Images were then captured at all four characteristic fluorophore wavelengths for each individually stained section using sequential acquisition, where fluorescent excitation and image acquisition are performed for each channel separately. This minimizes spectral bleed through between channels, as spectral emissions from one fluorophore cease prior to excitation and acquisition for the next channel.

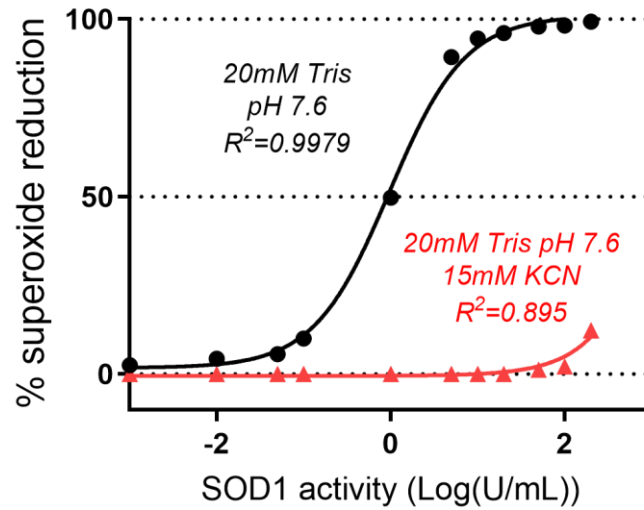

**Supplementary Figure 4. Standard curve describing the relationship between % superoxide reduction and SOD1 activity under assay parameters.** Curves were generated using commercial SOD1 (0.001-200U/mL,  $\geq 2,500$  units activity/mg protein; Sigma-Aldrich, USA) in the presence (red) and absence (black) of 15mM potassium cyanide (KCN). SOD1 activity values were transformed using  $X=\text{Log}(X)$  to improve non-linear regression curve fit.

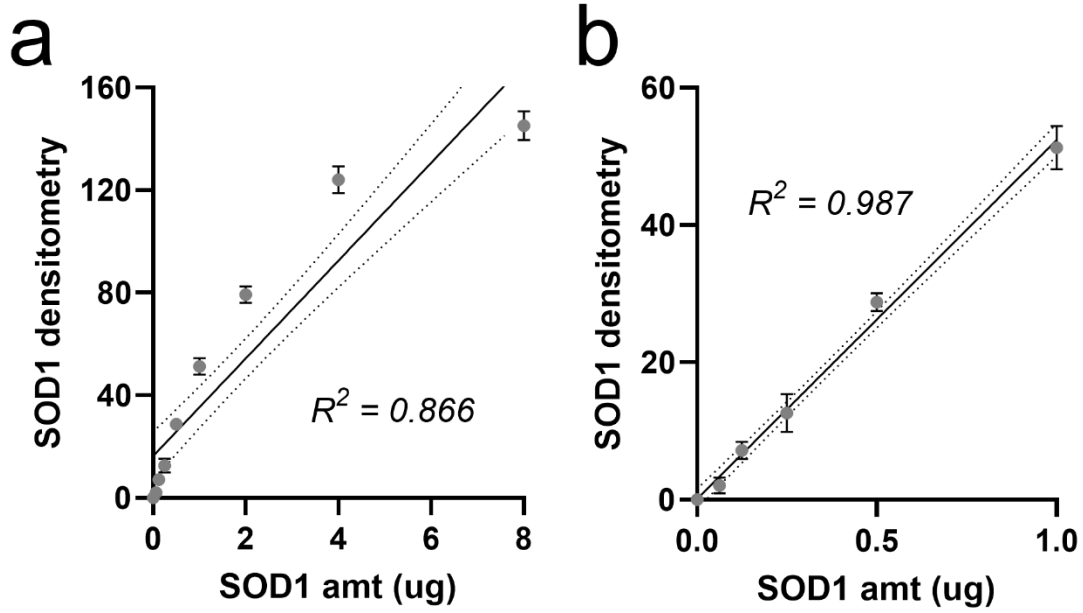

**Supplementary Figure 5. Correlation between SOD1 protein levels and SOD1 immunoblot densitometry.** Recombinant human SOD1 protein amount (ug) is linearly correlated with SOD1 immunoblot densitometry, as measured using ImageLab Software (Bio-Rad), when the amount of protein loaded per lane is less than 1ug. Data were obtained using triplicate sample preparations, and represent mean $\pm$ SEM.



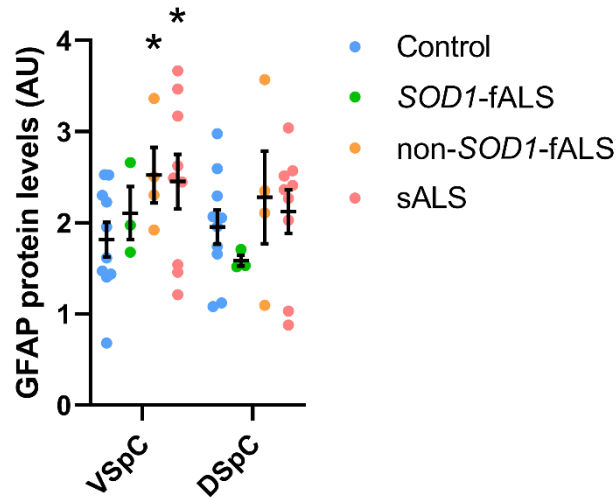

**Supplementary Figure 6. GFAP protein levels in the ventral and dorsal spinal cord of all post-mortem cases.** Protein levels were measured in the ventral (VSpC) and dorsal (DSpC) spinal cord using immunoblotting and are expressed as arbitrary units (AU). Two-way ANOVA with Sidak's multiple comparisons post-hoc tests revealed a significant increase in GFAP protein levels in the VSpC of non-SOD1-fALS and sALS cases compared with controls. \* $p < 0.05$ . Data represent mean $\pm$ SEM.

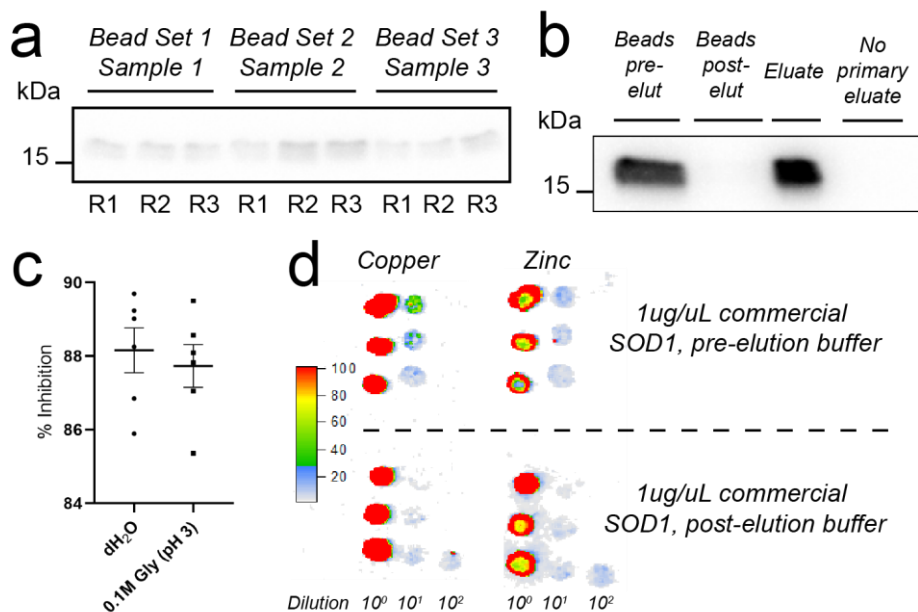

**Supplementary Figure 7. Immunoprecipitation did not alter the metallation or antioxidant activity of a commercially available SOD1 standard.** **a**, Immunoblotting of protein extracts, post-immunoprecipitation, for SOD1 revealed that 10mg of antibody-coupled dynabeads captured 90-95% of SOD1 protein from 200ug total protein extract. This capture efficiency did not diminish over three rounds (R1-3) of capture/elution using the same set of antibody-coupled dynabeads. **b**, 10mg antibody-coupled dynabeads were incubated with 200ug total protein extract to capture SOD1 protein. Beads were then divided in half, the second set underwent incubation with eluant, and eluate removed and stored separately for analysis. Both sets of dynabeads (pre- and post-elution) were then boiled in SDS-PAGE loading buffer, and the supernatants of these incubations, as well as the complete eluate resulting from elution of the second set of dynabeads, were immunoblotted for SOD1 protein. No SOD1 remained on dynabeads post-elution. SOD1 was also not identified in immunoprecipitates prepared using dynabeads that were not conjugated to our capture antibody (no primary). **c,d**, 10ug/uL of a commercially available SOD1 standard was diluted to 2ug/uL with 0.1M glycine (pH 3), and then further diluted to 1ug/uL with Ambic (pH 8), mimicking immunoprecipitation buffer conditions. The amount of SOD1 activity was measured in this solution, as well as in a 1ug/uL control solution of the SOD1 standard, and no difference in SOD1 activity was found between the two solutions (**c**; Mann-Whitney U test,  $p = 0.59$ ,  $U = 14$ ). The amount of copper and zinc bound to SOD1 was also measured in these solutions using a novel laser ablation-inductively coupled plasma-mass spectrometry protocol, and no difference in copper or zinc levels were observed (**d**; Mann-Whitney U test; copper:  $p = 0.4$ ,  $U = 2$ ; zinc:  $p = 0.4$ ,  $U = 2$ ).

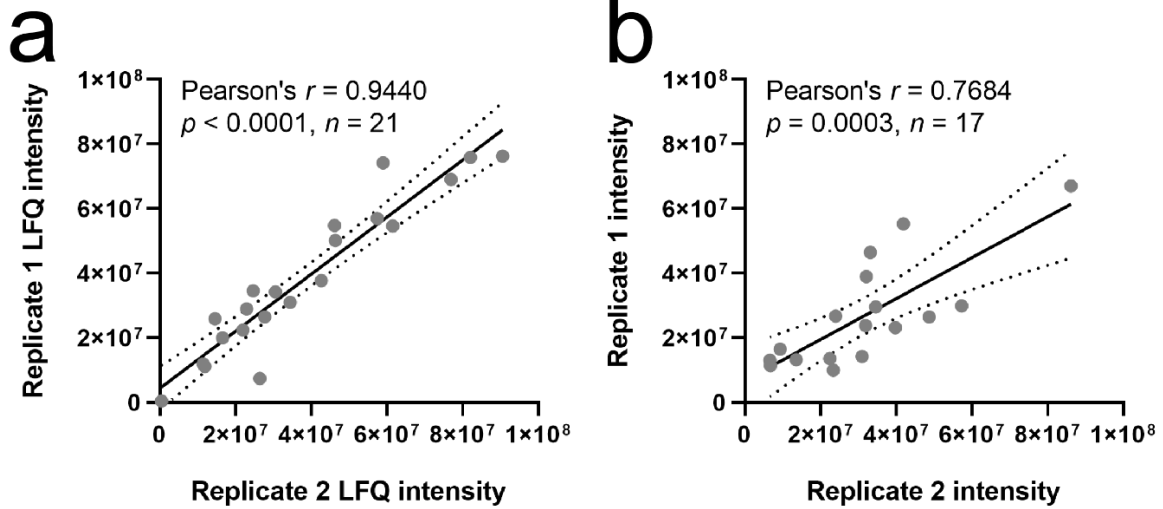

**Supplementary Figure 8. The amount of SOD1 protein and its modified peptides are consistent between technical replicates analysed using liquid chromatography-tandem mass spectrometry.** The amount of SOD1 protein (a) and redox modified histidine residue 46 (b) are highly correlated between technical replicates of the same sample, as determined by label-free quantification (LFQ) following liquid chromatography-tandem mass spectrometry (greater detail available in methods section). Pearson's correlation coefficient ( $r$ ), the number of samples ( $n$ ) and the statistical significance of each correlation ( $p$ ) are included in each panel.

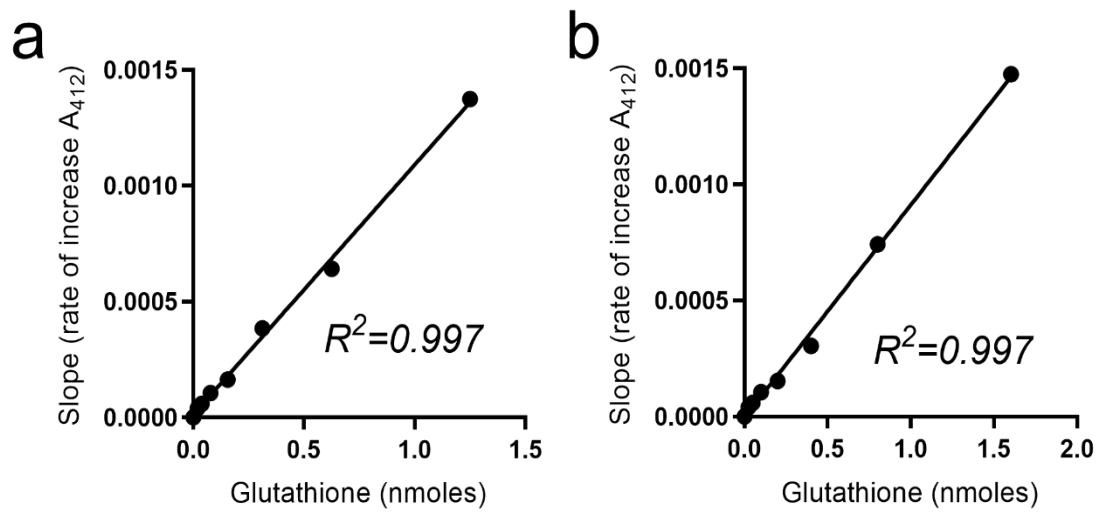

**Supplementary Figure 9. Standard curves describing the relationship between the amount of glutathione and the rate of increase in absorbance at 412nm wavelength ( $A_{412}$ ).** a,b, Curves generated using commercial glutathione (0-1.6 nmol) in the absence (a) and presence (b) of an adhesive plate seal used to maintain anaerobic conditions throughout the assay.

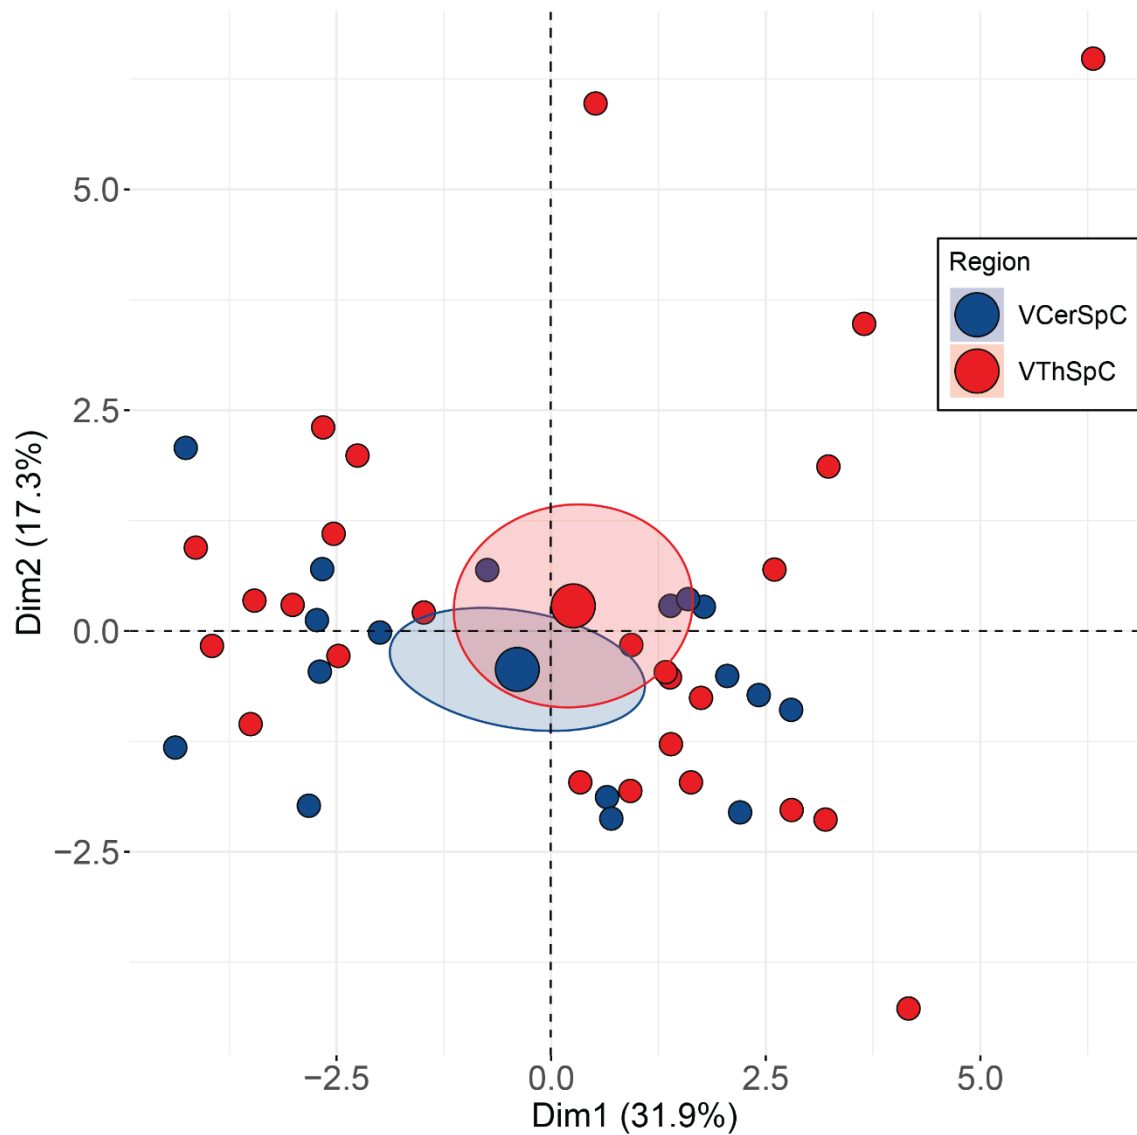

**Supplementary Figure 10. A principal component analysis found no sample clustering according to ventral spinal cord level (cervical vs thoracic).** PCA plot of ventral spinal cord samples from control and ALS cases. Blue dots represent samples obtained from ventral cervical spinal cord (VCerSpC), and red dots are those from ventral thoracic spinal cord (VThSpC). Large dots with coloured ellipses represent the centroid for that category or grouping and its 95% confidence interval. See methods for complete details of the variables included in this PCA.

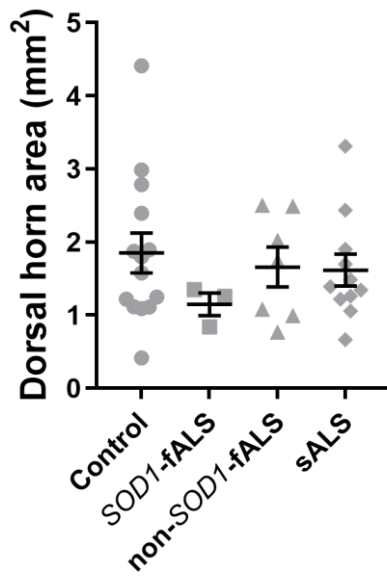

**Supplementary Figure 11. Quantification of dorsal horn grey matter volume as an index of neurodegeneration in this region.** Data represent mean  $\pm$  SEM. Dorsal horn area did not differ between ALS subgroups and controls (Kruskal-Wallis H Test,  $p = 0.7$ ,  $H = 1.42$ ).

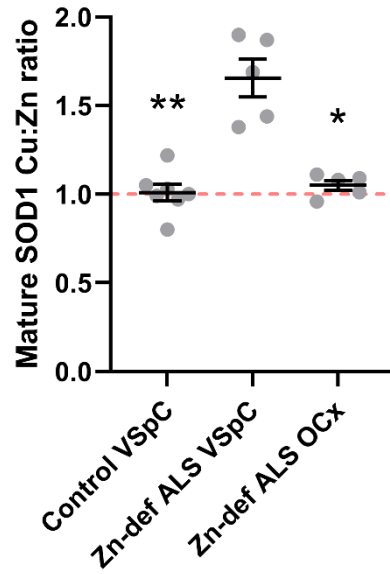

**Supplementary Figure 12. Enzymatically-active, mature SOD1 copper:zinc ratio measured in the control and *SOD1*-fALS ventral spinal cord (VSpC) and the *SOD1*-fALS occipital cortex (OCx).** Data represent mean  $\pm$  SEM. The red dotted line marks the expected ratio of copper:zinc bound to enzymatically-active, mature SOD1. Active SOD1 copper:zinc ratios were elevated in the VSpC, but not OCx, of *SOD1*-fALS cases compared with controls (Kruskal-Wallis H test with Dunn's multiple comparisons post-hoc tests; *SOD1*-fALS VSpC:  $p = 0.032$ ; *SOD1*-fALS OCx:  $p = 0.59$ ). \*  $p < 0.05$  compared with the control VSpC.

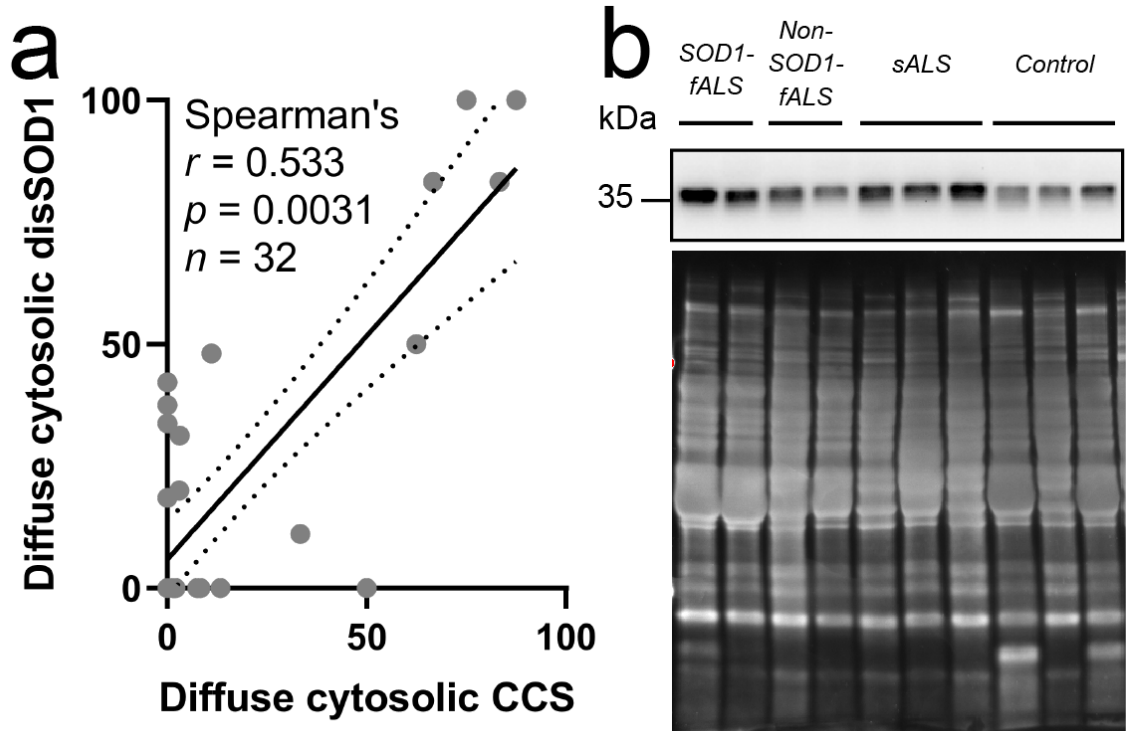

**Supplementary Figure 13. Additional CCS protein data.** **a**, Diffuse cytosolic CCS and disSOD1 are correlated in the ventral spinal cord. Spearman's  $r$  coefficient,  $p$  value and the number of XY pairs analysed ( $n$ ) are stated within the panel. A correlation is strong if Spearman's  $r = 0.5$  or higher. **b**, Representative CCS immunoblot and sypro ruby blot stain for total protein prepared from ventral spinal cord tissue extracts.



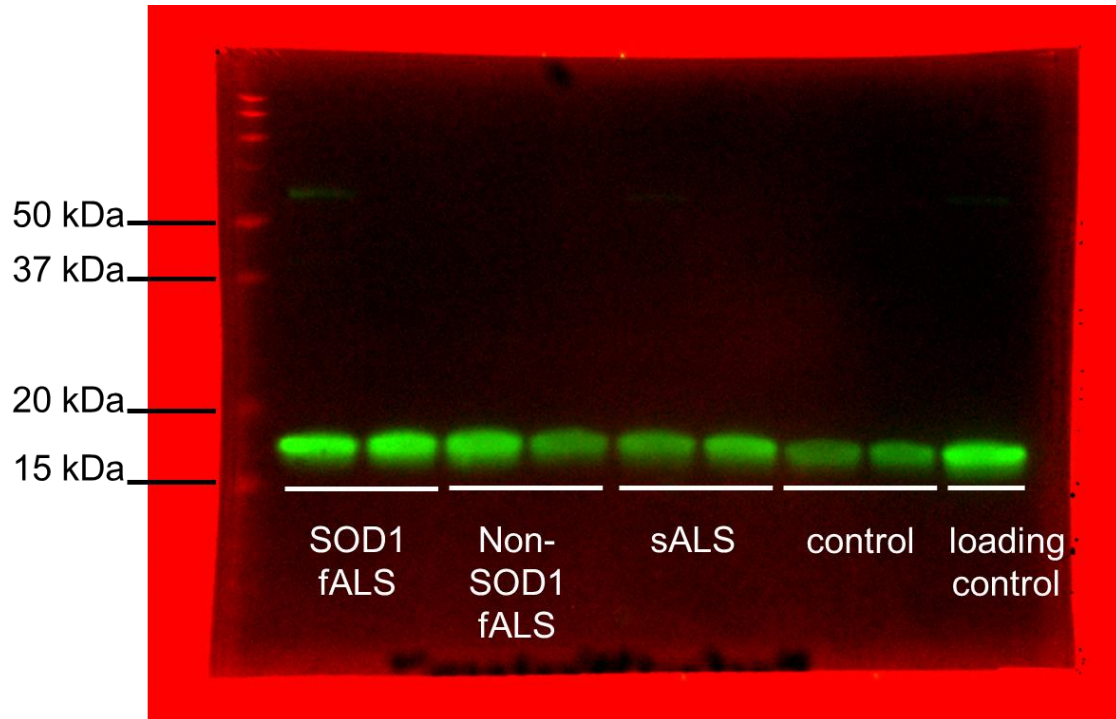

**Supplementary Blot 1. Full-length blot used to make panel B of Figure 2.** SOD1 chemiluminescence (Biolegend #850701) displayed in green, whilst Biorad Precision Plus Protein Dual Xtra Standards (Biorad #1610377) are displayed in red.

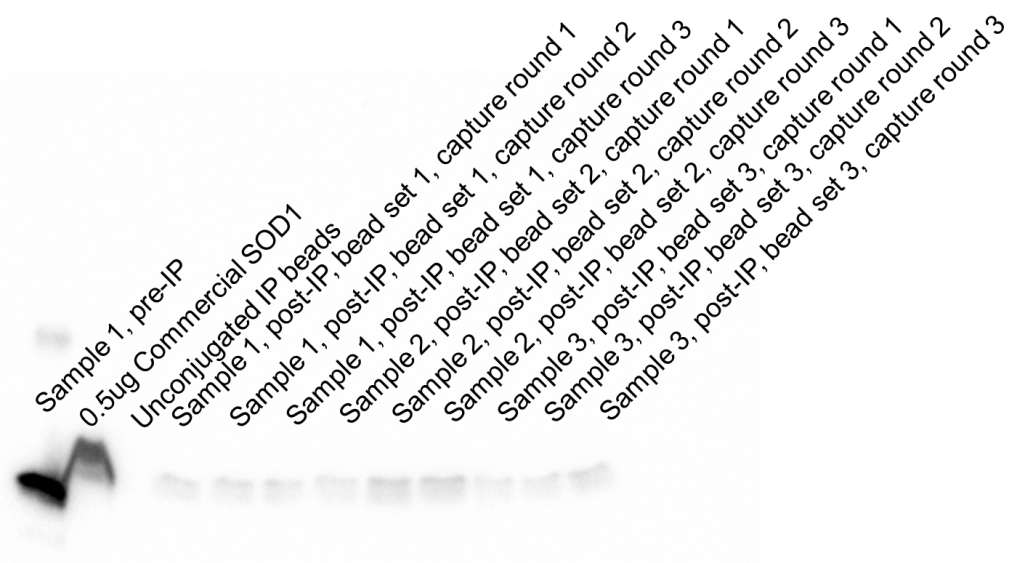

**Supplementary Blot 2. Full-length blot used to make panel A of Supplementary Figure 7. SOD1 chemiluminescence (Biolegend #850701) displayed in black.**

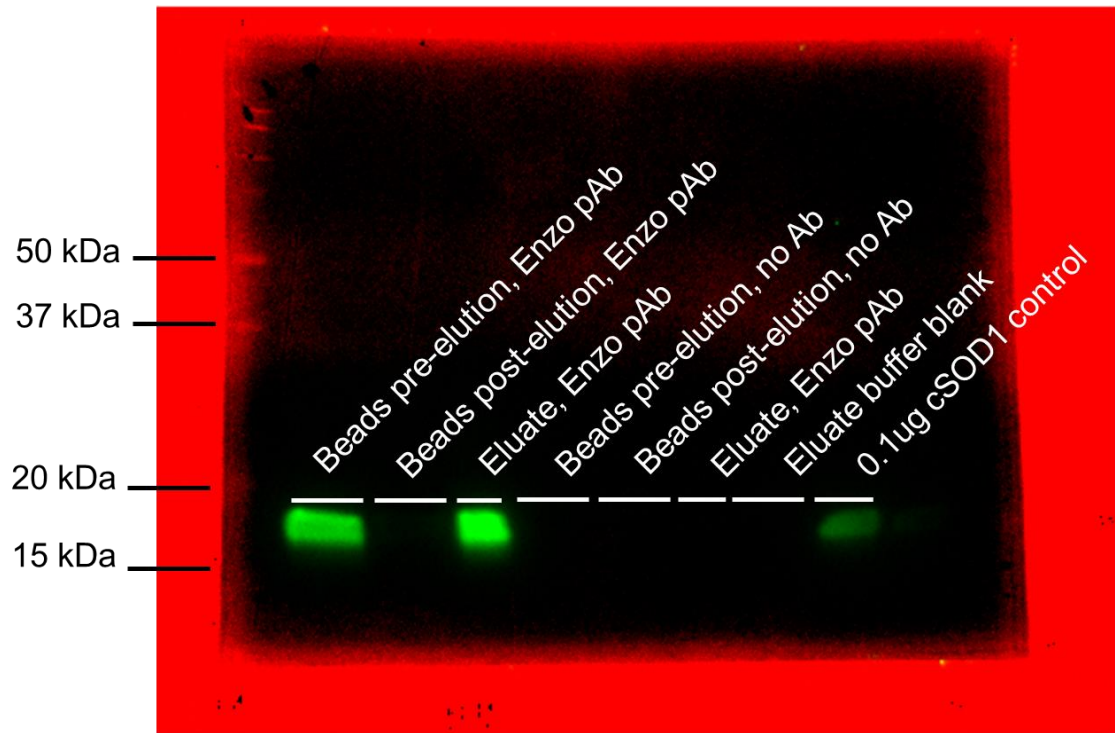

**Supplementary Blot 3. Full-length blot used to make panel B of Supplementary Figure 7.** SOD1 chemiluminescence (Biolegend #850701) displayed in green, whilst Biorad Precision Plus Protein Dual Xtra Standards (Biorad #1610377) are displayed in red. Abbreviations: cSOD1, commercial SOD1 standard (Sigma-Aldrich, USA).

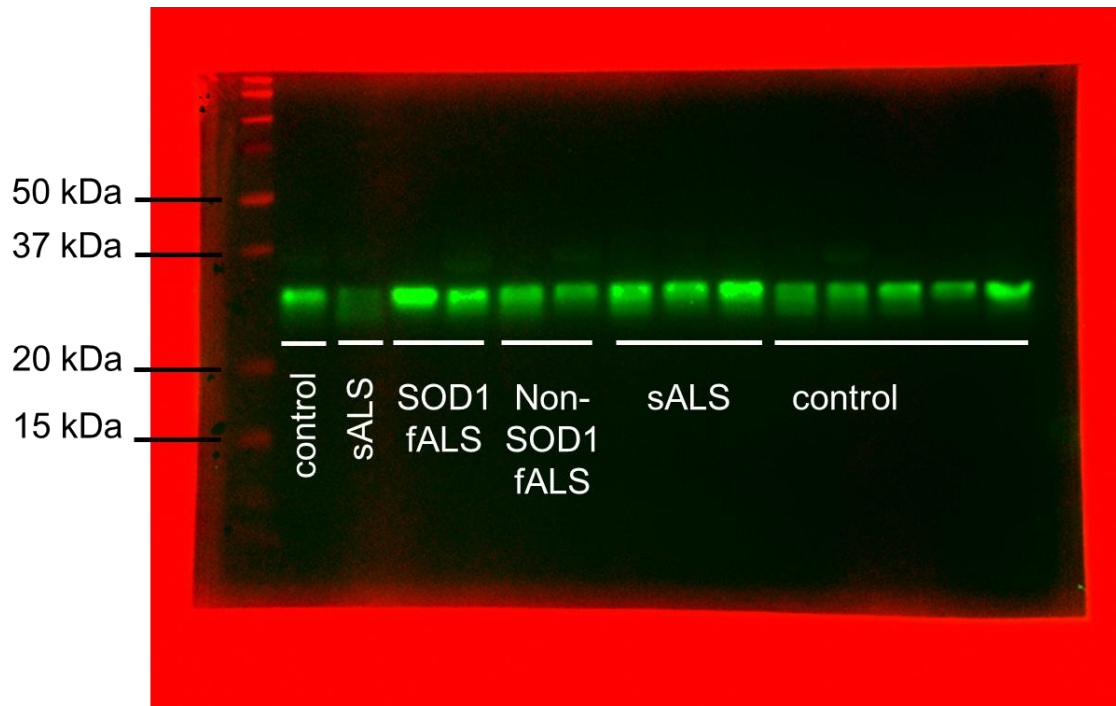

**Supplementary Blot 4. Full-length blot used to make panel B of Supplementary Figure 13.** CCS chemiluminescence (Santa Cruz #sc-55561) displayed in green, whilst Biorad Precision Plus Protein Dual Xtra Standards (Biorad #1610377) are displayed in red.
